# Supplementary material for: TUG1 Is a Regulator of AFP and Serves as Prognostic Marker in Non-Hepatitis B Non-Hepatitis C Hepatocellular Carcinoma
Source: MDPI journal article supplement (doi:10.3390/cells9020262), 2020-01-21
Supplement: s1 [file s1]

Table S1. List of the TUG1 shRNA and sgRNA sequences used in this study.

| Name (Clone ID)           | target sequence         |
|---------------------------|-------------------------|
| shTUG1#1 (TRCN0000139193) | CTGTTGACCTTGCTGTGAGAA   |
| shTUG1#1 (TRCN0000145288) | GCTCCATCCAAAGTGAATTAT   |
| sgTUG1#1                  | GATCCGGGTAGTGCCCGGTCAGG |
| sgTUG1#2                  | CACTATCGGAGACAAAGCGGTGG |
| sgTUG1#3                  | GGACACGCAGCCCGCCAATCAGG |

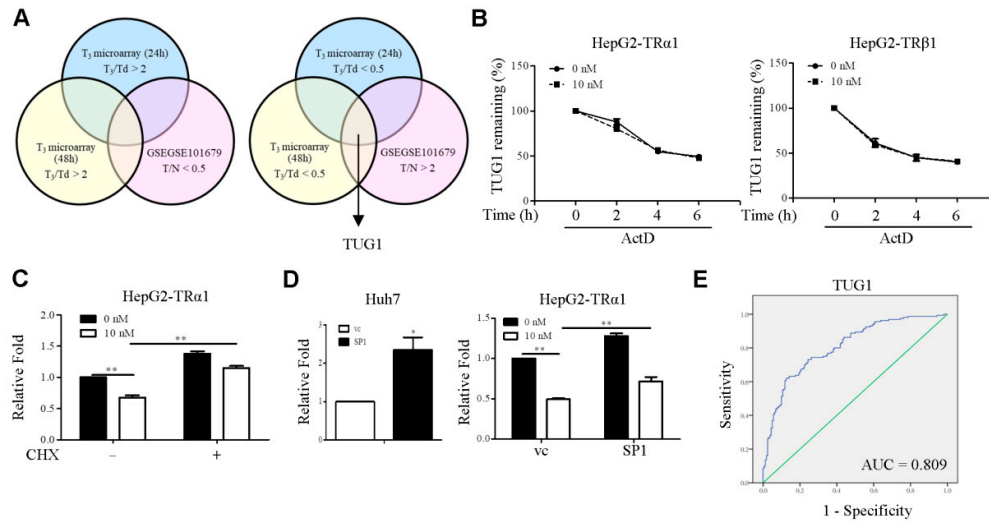

Supplementary Figure 1

### Supplementary Figure 1. TUG1 is indirectly regulated by T<sub>3</sub>/TR.

(A) Venn diagram for overlapping lncRNAs in the three microarray analysis. (B) T<sub>3</sub> does not affect the stability of TUG1 RNA. After T<sub>3</sub> treatment for 24 h, HepG2-TR cells were treated with actinomycin D (ActD, 2 μg/ml) for the indicated times. Total RNA was extracted and subjected to qRT-PCR analysis. (C) HepG2-TRα1 cells were co-treated with/without CHX and T<sub>3</sub>, and TUG1 RNA levels measured using qRT-PCR, with 18S rRNA used as a loading control. (D) TUG1 RNA levels were measured in SP1-overexpressing Huh7 and HepG2-TRα1 cell lines. 18S rRNA was used as a loading control. (E) ROC analysis of HCC-related lncRNA biomarker. AUC, area under the curve.

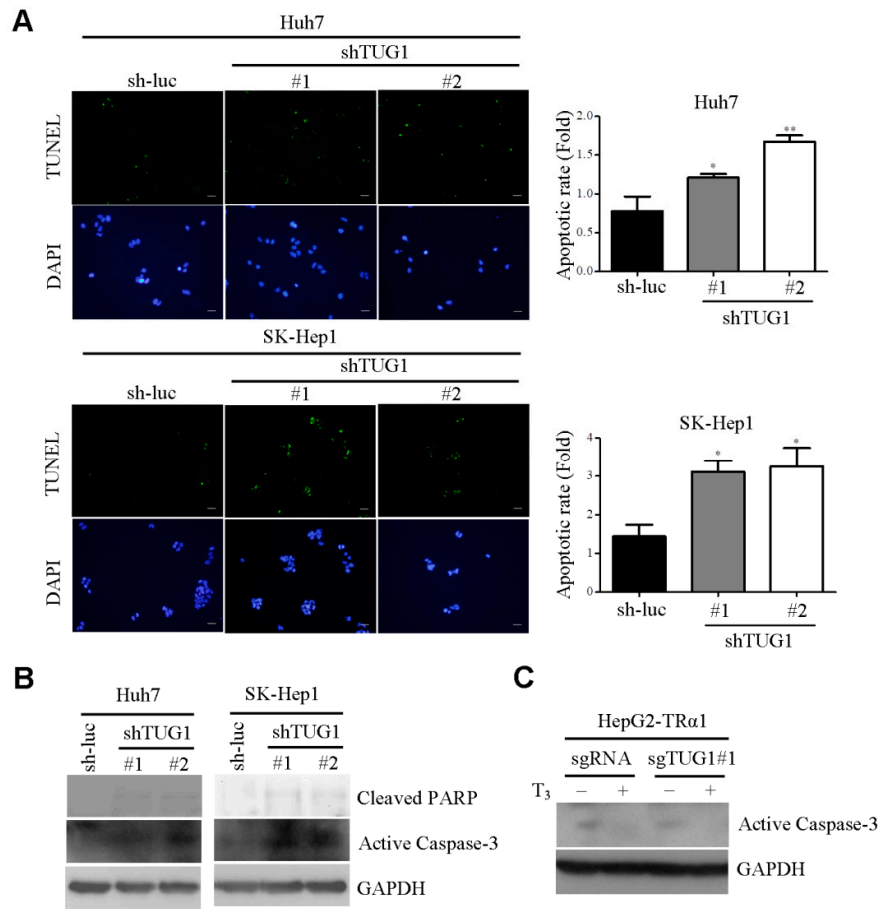

**Supplementary Figure 2. Effect of TUG1 on apoptosis determined in hepatoma cell lines.**

(A) TUNEL staining showed knockdown of TUG1 in Huh7 and Sk-Hep1 cells accelerated apoptosis. (B) Expression levels of caspase-3 and PARP were determined in TUG1-depleted cells. GAPDH was used as a loading control. (C) Western blot analysis of active caspase-3 expression in TUG1-overexpressing cells was treated with T<sub>3</sub> (10 nM). GAPDH was used as the loading control.

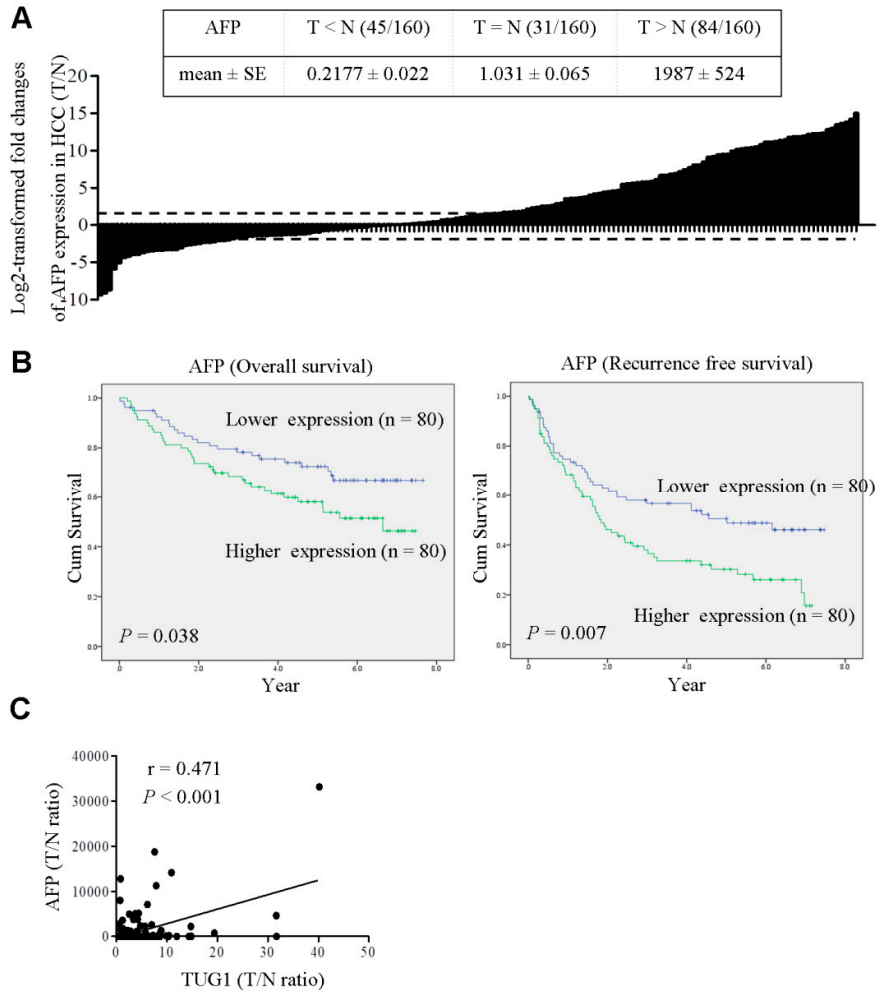

**Supplementary Figure 3. Overall and recurrence-free survival rates of HCC patients in relation to AFP expression.**

(A) AFP mRNA levels were analyzed in HCC specimens via qRT-PCR with 18S rRNA as the loading control. Values are expressed as log 2-transformed relative fold decrease or increase in mRNA expression, relative to that in adjacent nontumorous tissues after normalization to the housekeeping gene. A positive log 2-transformed fold change indicates higher expression in tumor specimens whereas a negative value signifies relatively decreased expression. (B) Kaplan-Meier analysis of overall survival (OS) and recurrence-free survival (RFS) based on AFP expression in HCC specimens. OS and RFS were analyzed using the log-rank test. Median expression levels of AFP gene was used as the cutoff. (C) The expression of TUG1 and AFP in HCC specimens were determined by qRT-PCR. 18S rRNA was used as a loading control. Results of Pearson correlation coefficient analysis confirmed that TUG1 is significantly positively correlated with AFP.
